# Supplementary material for: Zwitterionic nanoparticles for thermally activated drug delivery in hyperthermia cancer treatment
Source: Royal Society of Chemistry journal article supplement (doi:10.1039/d4nr00723a), 2024-01-01
Supplement: d4nr00723a1.pdf [file d4nr00723a1.pdf]

## Supplementary Information

### **Zwitterionic nanoparticles for thermally activated drug delivery in hyperthermia cancer treatment**

Camillo Colli<sup>a</sup>, Ilenia Masi<sup>b</sup>, Emanuela Jacchetti<sup>a</sup>, Silvia Santoni<sup>a,c</sup>, Mattia Sponchioni<sup>a,\*</sup>, Bianca  
Maria Colosimo<sup>c</sup>, Laura Rosanò<sup>b</sup>, Manuela Teresa Raimondi<sup>a</sup>, Emanuele Mauri<sup>a,\*</sup>, Davide  
Moscatelli<sup>a</sup>

<sup>a</sup>Department of Chemistry, Materials and Chemical Engineering “G. Natta”, Politecnico di Milano, piazza L.  
da Vinci 32, 20133 Milan, Italy

<sup>b</sup>Institute of Molecular Biology and Pathology, National Research Council (CNR), Rome 00185, Italy

<sup>c</sup>Department of Mechanical Engineering, Politecnico di Milano, Via La Masa, 1, 20156, Milan, Italy

\*Mattia Sponchioni. Tel.: +39 022399 3197; e-mail: [mattia.sponchioni@polimi.it](mailto:mattia.sponchioni@polimi.it)

\*Emanuele Mauri. Tel.: +39 022399 3397; e-mail: [emanuele.mauri@polimi.it](mailto:emanuele.mauri@polimi.it)

### Synthesis of $p(\text{SB-co-ZB})_{200}$ copolymers

Table S1 reports the amount of reagents involved in the syntheses of the zwitterionic copolymers. GPC of the copolymer  $p(110\text{SB-co-}90\text{ZB})$ , as representative specimens, is showed in Figure S1.

**Table S1.** Mixture compositions for the synthesis of the different  $p(\text{SB-co-ZB})_{200}$  copolymers.

| Copolymer        | DP <sub>SB</sub> (-) | DP <sub>ZB</sub> (-) | SB (mg) | ZB (mg) | ACVA (mg) | CPA (mg) |
|------------------|----------------------|----------------------|---------|---------|-----------|----------|
| p(105SB-co-95ZB) | 105                  | 95                   | 254     | 243     | 0.81      | 2.42     |
| p(110SB-co-90ZB) | 110                  | 90                   | 267     | 231     | 0.81      | 2.42     |
| p(115SB-co-85ZB) | 115                  | 85                   | 279     | 218     | 0.81      | 2.42     |
| p(120SB-co-80ZB) | 120                  | 80                   | 292     | 206     | 0.81      | 2.42     |
| p(125SB-co-75ZB) | 125                  | 75                   | 304     | 193     | 0.81      | 2.42     |

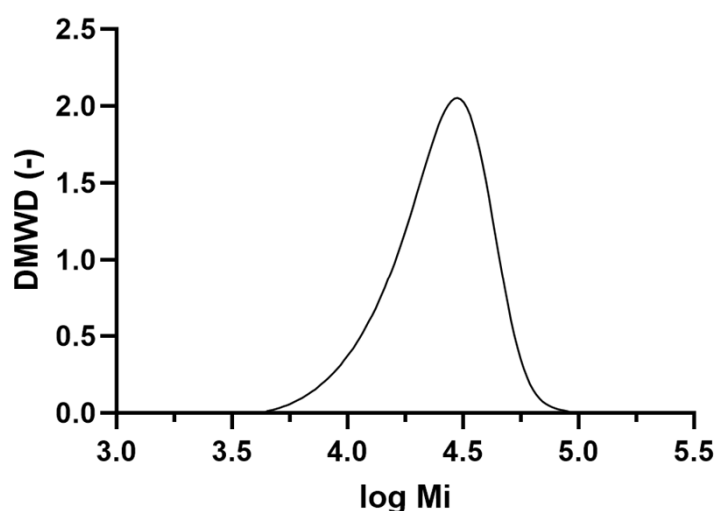

**Figure S1.** GPC analysis of zwitterionic copolymer  $p(110\text{SB-co-}90\text{ZB})$ .

### Paclitaxel calibration curve

The calibration curve of PTX was estimated via HPLC, preparing a stock solution of drug at concentration 1 mg/mL in acetonitrile. The calibration solutions with concentration 500  $\mu\text{g/mL}$ , 100  $\mu\text{g/mL}$ , 10  $\mu\text{g/mL}$ , 5  $\mu\text{g/mL}$ , 1  $\mu\text{g/mL}$ , 0.5  $\mu\text{g/mL}$ , 0.1  $\mu\text{g/mL}$ , 0.05  $\mu\text{g/mL}$  and 0.01  $\mu\text{g/mL}$  were prepared by serial dilutions of the stock solution in acetonitrile. UV-vis measurements were recorded at  $\lambda = 230$  nm on a HPLC column (Agilent 1100 System, Agilent Technologies), packed with silica beads and using a mixture of acetonitrile-water 80:20 as a mobile phase.

Calibration curve was obtained by plotting the integral values of the PTX peak vs. drug concentration and using a linear fitting of the experimental data, according to the Lambert-Beer law (Figure S2).

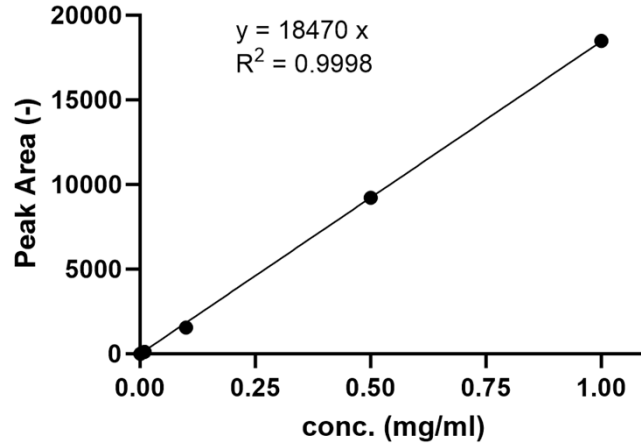

**Figure S2.** PTX calibration curve in physiological solution (0.9% w/w NaCl)

### *Dose-response curve of PTX*

The dose-response curve of PTX on SKOV3 was evaluated at 24 h, following the hyperthermia treatment (1 h at 43 °C), using the MTT assay. Cells were cultured in adhesion. The value of 1.3 nM was identified as the IC<sub>50</sub> level and showed by the dashed line in Figure S3.

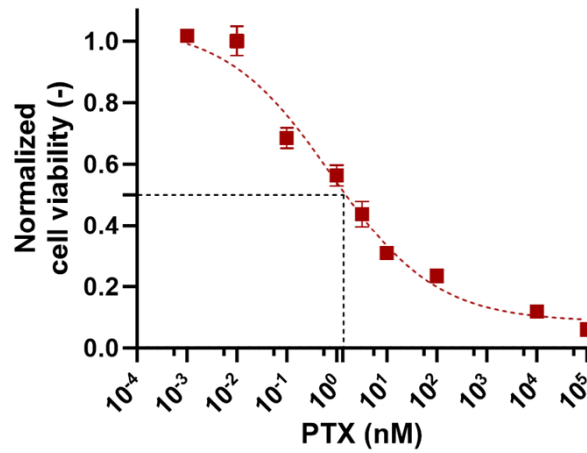

**Figure S3.** Dose-response curve of PTX. IC<sub>50</sub> value (black dashed line) of 1.3 nM is highlighted.

### UCST behavior of *p*(SB-co-ZB) copolymers

The synthesized *p*(SB-co-ZB) copolymers were separately dispersed in physiological solution (5 mg/ml) and the corresponding cloud point was evaluated through UV-Vis spectrophotometric analysis ( $\lambda=500$  nm), setting a heat-up ramp of 1 °C/min.  $T_{cp}$  was identified as the inflection point of the curve transmittance vs temperature, corresponding to 50% transmittance (Figure S4).

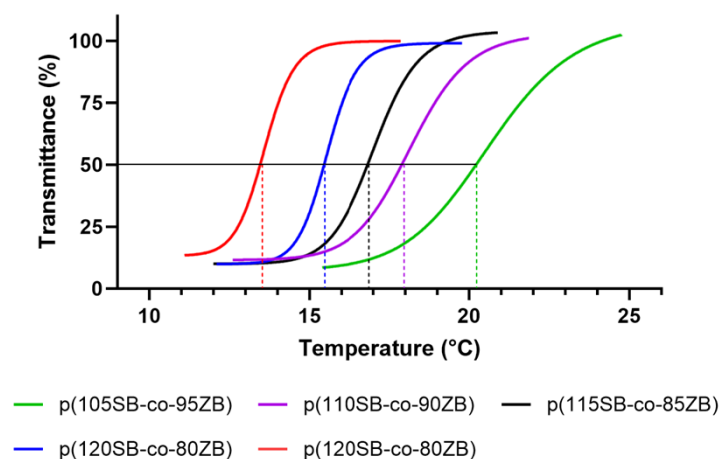

**Figure S4.** (a) Evaluation of cloud point ( $T_{cp}$ ) of the synthesized zwitterionic copolymers in graph transmittance vs temperature, by UV-vis analysis.

### IR spectrum of HEMACL<sub>3</sub>

Figure S5 shows the IR spectrum of HEMACL<sub>3</sub>. Similarly to HEMACL<sub>5</sub>, the characteristic peaks of the polymer are highlighted: C-C(=O)-O stretching in the range 1100-1250 cm<sup>-1</sup> (#), C=O stretching at 1720 cm<sup>-1</sup> (##), C-H stretching at 2850-3000 cm<sup>-1</sup> (###) and -OH stretching at 3400 cm<sup>-1</sup> (####).

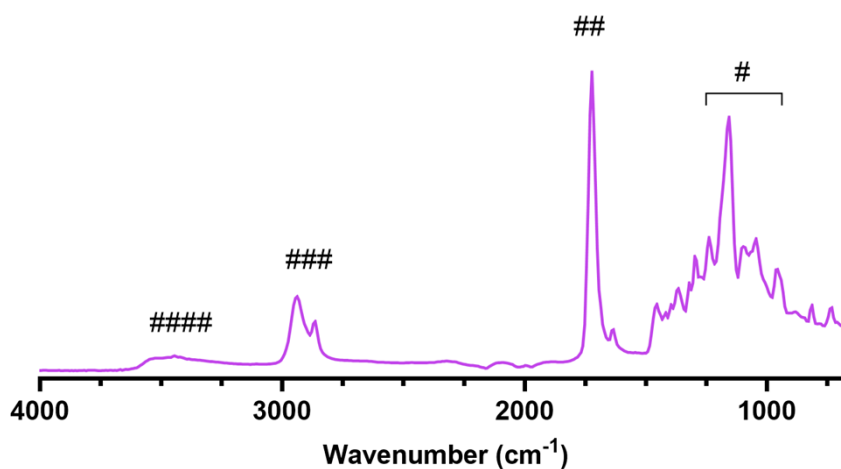

**Figure S5.** IR spectrum of HEMACL<sub>3</sub>.

### $T_{cp}$ estimation for UCST-type NPs

The UCST behavior of all synthesized NPs was evaluated through DLS analysis, considering the phase transition as a function of temperature (heat-up ramp of 1 °C/5 min). The average NPs size is reported in Figures S6 for NPs obtained using HEMACL<sub>5</sub>, and in Figure S7 for NPs containing HEMACL<sub>3</sub>; the  $T_{cp}$  was estimated as inflection point of the hydrodynamic diameter curve. For HEMACL<sub>5</sub>-based NPs, their thermoresponsiveness after a heating-cooling-heating cycle is reported, showing a narrow hysteresis which suggests the reversible effect of the temperature on the particle size.

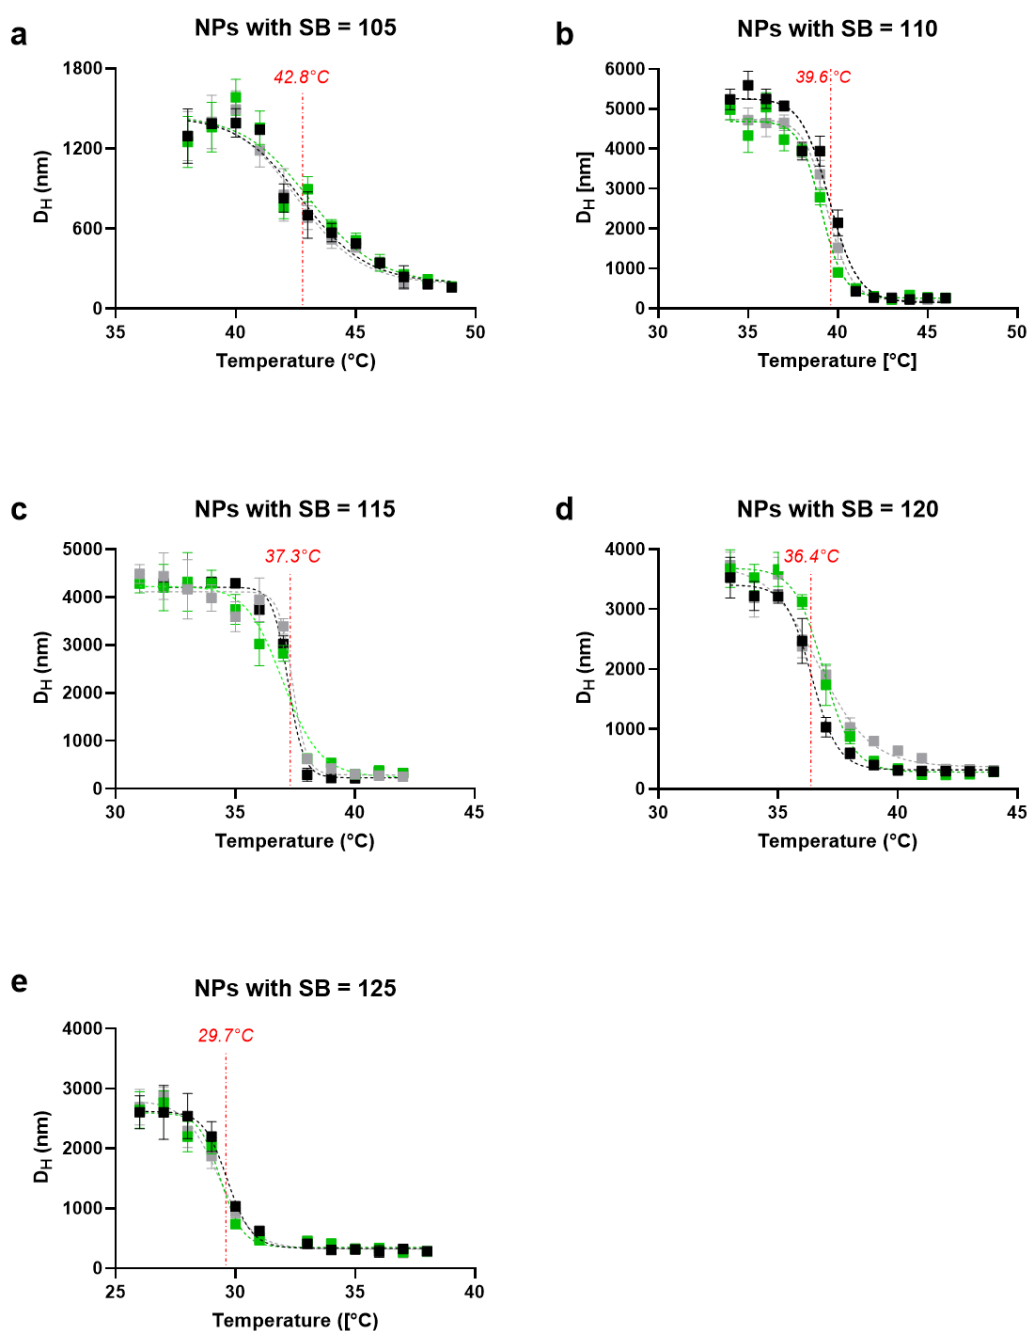

**Figure S6.** DLS curves of the hydrodynamic diameter of HEMACL<sub>5</sub>-based NPs as a function of the temperature. The  $T_{cp}$  for each specimens is highlighted in red. The heating/cooling cycle is reported as follows: first heating step in black, cooling step in green, and second heating phase in grey. The graphs are labelled according to the zwitterioni copolymer used in the RAFT emulsion polymerization. a: p(105SB-co-95ZB); b: p(115SB-co-85ZB); c: p(120SB-co-80ZB); d: p(125SB-co-75ZB).

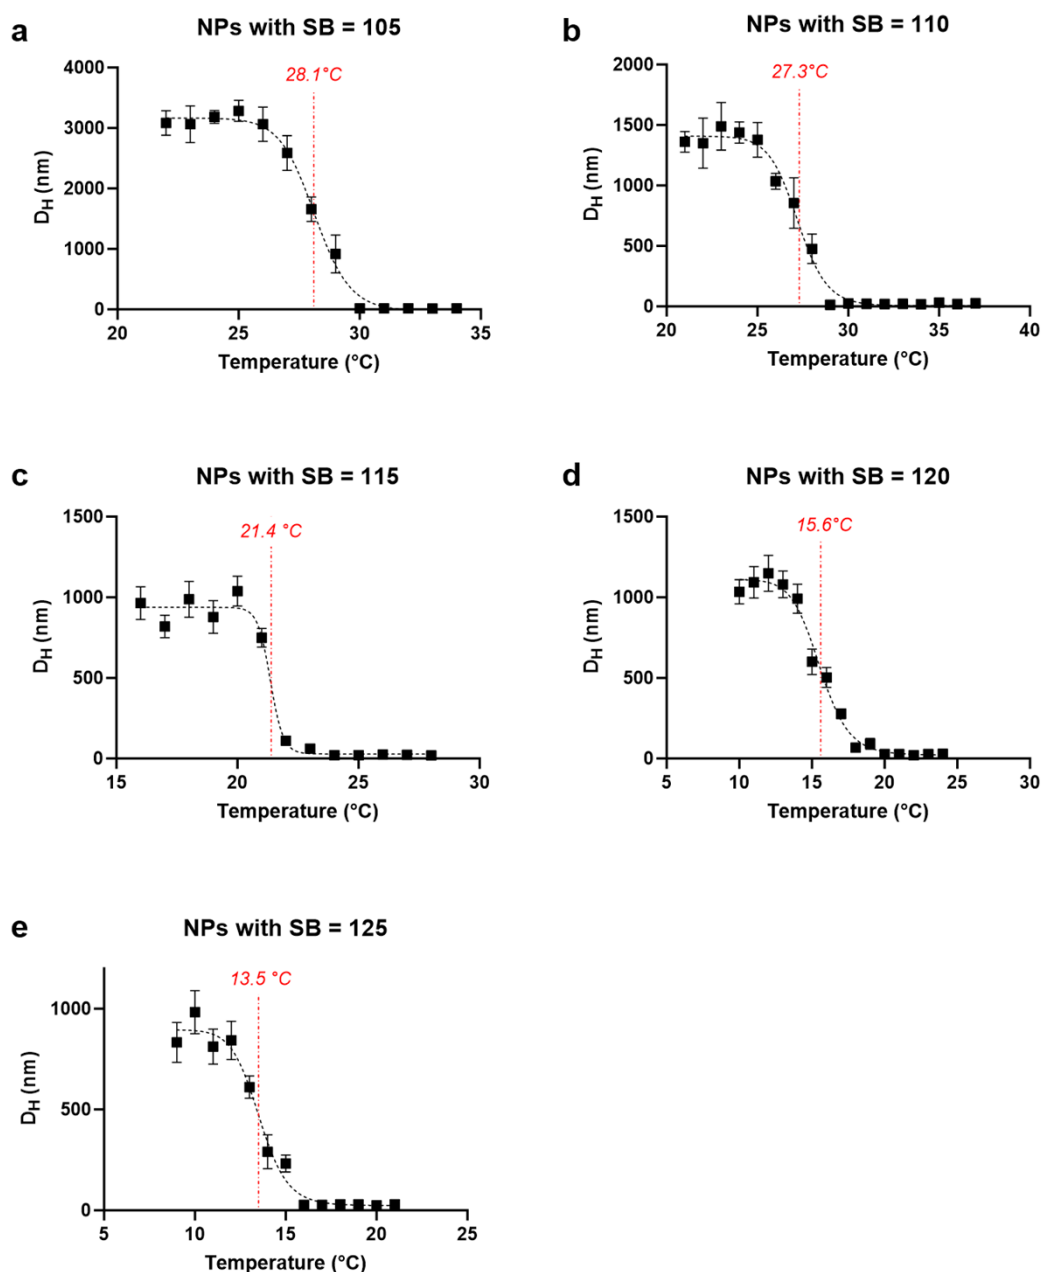

**Figure S7.** DLS curves of the hydrodynamic diameter of HEMACL<sub>3</sub>-based NPs as a function of the temperature. The  $T_{cp}$  for each specimens is highlighted in red. The graphs are labelled according to the zwitterioni copolymer used in the RAFT emulsion polymerization. a: p(105SB-co-95ZB); b: p(110SB-co-90ZB); c: p(115SB-co-85ZB); d: p(120SB-co-80ZB); e: p(125SB-co-75ZB).

### *3D rendering of NPs internalization*

Figure S8 shows a representative 3D rendering of the confocal z-stack micrographs of NPs internalization in SKOV3 cells after 24 h incubation. Calcein-AM staining confirms that cells preserve their viability.

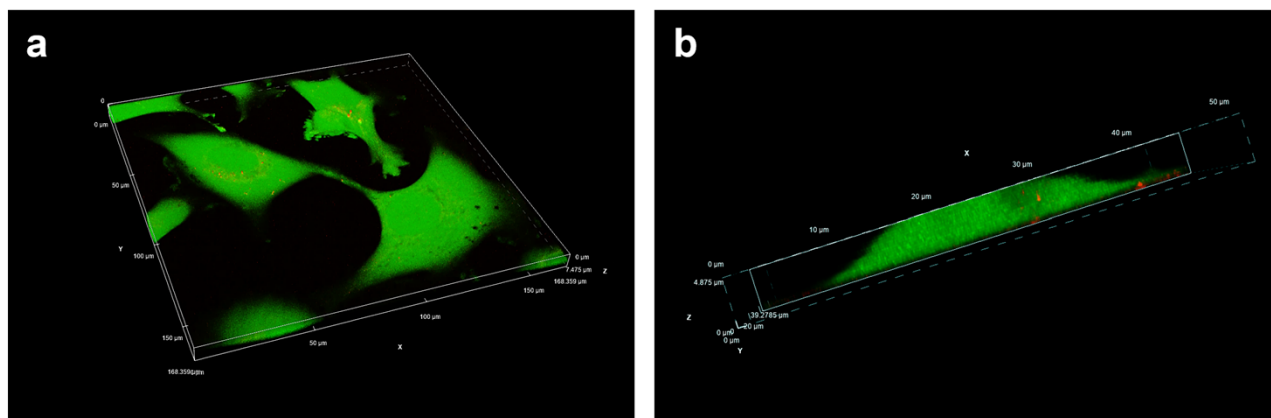

**Figure S8.** Representative 3D rendering of NPs internalization from confocal z-stack micrographs. In green are visible viable cells stained with Calcein-AM and in red NPs internalized in the cytosol. a) XY cross-sectional view, b) XZ cross-sectional view.
